# Supplementary material for: Cumulative complexity meta-metrics as an efficiency measure and predictor of process mass intensity (PMI) during synthetic route design
Source: Royal Society of Chemistry journal article supplement (doi:10.1039/d3gc00878a), 2023-01-01
Supplement: d3gc00878a1.pdf [file d3gc00878a1.pdf]

# Supplementary Information

## Cumulative complexity meta-metrics as an efficiency measure and predictor of PMI during synthetic route design

Lucrezia Angelini, Charlotte E. Coomber, Gareth P. Howell\*, George Karageorgis and Brian Taylor

### Contents

|                                           |    |
|-------------------------------------------|----|
| 1. Dataset compilation.....               | 2  |
| Step count.....                           | 2  |
| Linearity.....                            | 2  |
| Ideality.....                             | 2  |
| Convergence.....                          | 2  |
| PMI.....                                  | 2  |
| ACS PMI Predicted values.....             | 3  |
| SCScore and $\Sigma C_{SCS}$ .....        | 3  |
| $C_{M^*}$ and $\Sigma C_{M^*}$ .....      | 3  |
| FMW.....                                  | 3  |
| 2. Approach to statistical modelling..... | 3  |
| 3. Model for PMI prediction.....          | 4  |
| 4. Worked example AZD4831.....            | 5  |
| 5. Literature examples.....               | 6  |
| 6. Dataset.....                           | 10 |

## 1. Dataset compilation

The dataset used for analysis and model generation is shown in section 6 (120 compounds). Due to commercial limitations, we are unable to provide structures or structural identifiers.

A small number of datapoints were added (new data became available) or removed (found to be erroneous) after the model was generated and during the preparation of the manuscript. Based on this, there are some minor discrepancies between the graphs presented here (section 3) and those in the main manuscript.

### Step count

Longest linear sequence and total steps have been generated using the guidance and criteria outlined in the main manuscript.

As discussed in the main manuscript, step count (either longest linear sequence [LLS] or total) was not included as a parameter for modelling due to the requirement for continuous values. Using ordinal step count values, test analyses showed a tendency for each individual step number to be assessed independently and assigned unique coefficients, ultimately resulting in highly complex models. Additionally, any predictive model developed using step count as a parameter would not be applicable in cases where the step count is a previously unseen value.

Step count was used solely for the calculation of linearity (L, see below) and data comparison/visualisation during analysis.

### Linearity

Calculated using:

$$\text{Linearity } L = \frac{\text{steps (LLS)}}{\text{steps (total)}}$$

### Ideality

Calculated manually for each datapoint and may be subject to interpretation in a small number of cases.<sup>1</sup>

### Convergence

Calculated manually for each datapoint and may be subject to interpretation in a small number of cases.<sup>2</sup>

### PMI

Used as the primary response for modelling and calculated using:

$$PMI = \frac{\sum m(\text{input materials including water})}{m(\text{product})}$$

---

<sup>1</sup> T. Gaich, P. S. Baran, *J. Org. Chem.*, **2010**, 75, 14, 4657.

<sup>2</sup> J. B. Hendrickson, *J. Am. Chem. Soc.*, **1977**, 99, 16, 5439.

### ACS PMI Predicted values

Calculated using the online tool.<sup>3</sup> Assignment of reaction type is required which may be open to interpretation in some cases.

### SCScore and $\Sigma_{SCS}$

Individual SCScores were generated using the code provided by the authors.<sup>4</sup> Cumulative values for each compound were generated by summation of SCScores for the target compound and all preceding species along the longest linear sequence including the eventual starting material.

### $C_{M^*}$ and $\Sigma C_{M^*}$

A text file providing python code for the conversion of SMILES strings into  $C_{M^*}$  values is provided in the supplementary information section. This code will also calculate other complexity metrics ( $C_M$ ,  $C_{SE}$ ) from the original paper by Proudfoot.<sup>5</sup> Cumulative values for each compound were generated by summation of  $C_{M^*}$  values for the target compound and all preceding species along the longest linear sequence including the eventual starting material.

### FMW

Calculated from the target molecular structure (using Chemdraw or BioviaDraw) excluding associated salts and solvates etc.

## 2. Approach to statistical modelling

Penalised regression methods were selected based on the following:

- Better suitability to small datasets (as in this case) than more popular machine learning methods, neural networks and decision trees
- Simpler interpretation of the effect of descriptor parameters on responses (PMI)
- Compatible with correlated descriptor parameters
- Effectively maximise influential parameters and remove non-influential parameters, ultimately leading to simpler models
- Implementation of resultant models into software systems is typically straightforward

Parameters from section 1 were modelled against PMI using JMP Pro 16.1. After reviewing earlier modelling output including all parameters from section 1,  $L$ ,  $\Sigma C_{M^*}$ ,  $\Sigma_{SCS}$ , and FMW were selected for inclusion in the model fitting. Many of the options and settings for this type of analysis are software specific but the following general points may be useful:

- Two model fitting personalities were investigated (main parameters only and main parameters with 2-parameter interactions)
- A random seed (9) was specified to allow repeat analysis in JMP to output the same statistical results
- Various response distributions were investigated - Normal, Cauchy, t[5], exponential, LogNormal, Gamma and Weibull.
- Various estimation methods were investigated - Lasso, Elastic Net and Double Lasso

---

<sup>3</sup> A. Borovika, J. Albrecht, J. Li, A. S. Wells, C. Briddell, B. R. Dillon, L. J. Diorazio, J. R. Gage, F. Gallou, S. G. Koenig, M. E. Kopach, D. K. Leahy, I. Martinez, M. Olbrich, J. L. Piper, F. Roschangar, E. C. Sherer, M. D. Eastgate, *Nat. Sustain.*, **2019**, 2, 1034.

<sup>4</sup> C. W. Coley, L. Rogers, W. H. Green, K. F. Jensen, *J. Chem. Inf. Model.*, **2018**, 58, 2, 252.

<sup>5</sup> J. R. Proudfoot, *Bioorg. Med. Chem. Lett.* **2017**, 27, 2014.

- Hereditary parameters were not enforced meaning parameters found in 2-parameter interactions were not required to be present as main parameters (FMW in this case).
- KFold(10) analysis was used to generate average tuning parameters allowing subsequent model refinement

### 3. Model for PMI prediction

A large number of models were generated using the approach above. The eventual model for PMI prediction (below) was selected based on:

- Minimal estimate bias shown by a relatively even distribution of datapoints above and below the observed/predicted line
- Good estimate precision (density of datapoints close to the observed/predicted line)
- Subsequent analysis of the entire dataset showed a high coefficient of determination ( $R^2$ ) as discussed in the main manuscript
- Simplicity of the model using only L, FMW and  $\Sigma_{C_M^*}$

| Weibull Adaptive Double Lasso with KFold Validation |                       |                          |             |
|-----------------------------------------------------|-----------------------|--------------------------|-------------|
| Model Summary                                       |                       | Estimation Details       |             |
| Response                                            | PMI                   | Number of Grid Points    | 150         |
| Distribution                                        | Weibull               | Minimum Penalty Fraction | 0           |
| Estimation Method                                   | Adaptive Double Lasso | Grid Scale               | Square Root |
| Validation Method                                   | KFold                 |                          |             |

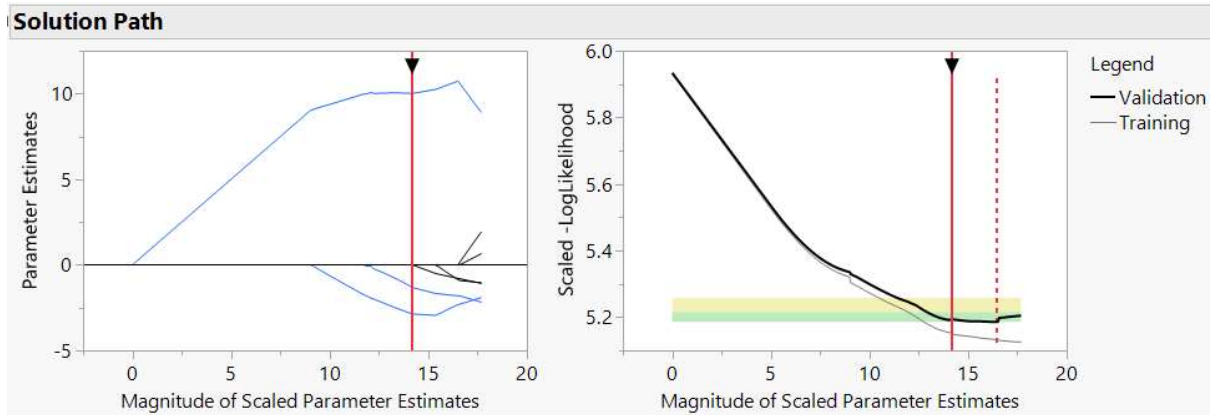

| Term                                                          | Estimate | Std Error | Wald ChiSquare | Prob > ChiSquare | Lower 95% | Upper 95% |
|---------------------------------------------------------------|----------|-----------|----------------|------------------|-----------|-----------|
| Intercept                                                     | 3.8791   | 0.2602    | 222.2912       | <0.0001*         | 3.3691    | 4.3890    |
| L                                                             | -0.8252  | 0.2406    | 11.7610        | 0.0006*          | -1.2968   | -0.3536   |
| $\Sigma_{C_{Scs}}$                                            | 0        | 0         | 0              | 1.0000           | 0         | 0         |
| $\Sigma_{C_M^*}$                                              | 0.04581  | 0.0026    | 321.8488       | <0.0001*         | 0.0408    | 0.0508    |
| FMW                                                           | 0        | 0         | 0              | 1.000            | 0         | 0         |
| (L - 0.9173)*( $\Sigma_{C_{Scs}}$ - 11.9107)                  | 0        | 0         | 0              | 1.000            | 0         | 0         |
| (L - 0.9173)*( $\Sigma_{C_M^*}$ - 37.4275)                    | 0        | 0         | 0              | 1.000            | 0         | 0         |
| (L - 0.9173)*( FMW - 311.2910)                                | 0        | 0         | 0              | 1.000            | 0         | 0         |
| ( $\Sigma_{C_{Scs}}$ - 11.9107)*( $\Sigma_{C_M^*}$ - 37.4275) | 0        | 0         | 0              | 1.000            | 0         | 0         |
| ( $\Sigma_{C_{Scs}}$ - 11.9107)*( FMW - 311.2910)             | 0        | 0         | 0              | 1.000            | 0         | 0         |

|                                                |         |                      |          |          |         |         |
|------------------------------------------------|---------|----------------------|----------|----------|---------|---------|
| $(\Sigma_{CM^*} - 37.4275) * (FMW - 311.2910)$ | -0.0001 | $2.4 \times 10^{-5}$ | 30.4399  | <0.0001* | -0.0002 | -0.0009 |
| Weibull dist. Parameters (scale)               | 0.4279  | 0.0348               | 150.9741 | <0.0001* | 0.3597  | 0.4962  |

### Actual by Predicted Plot

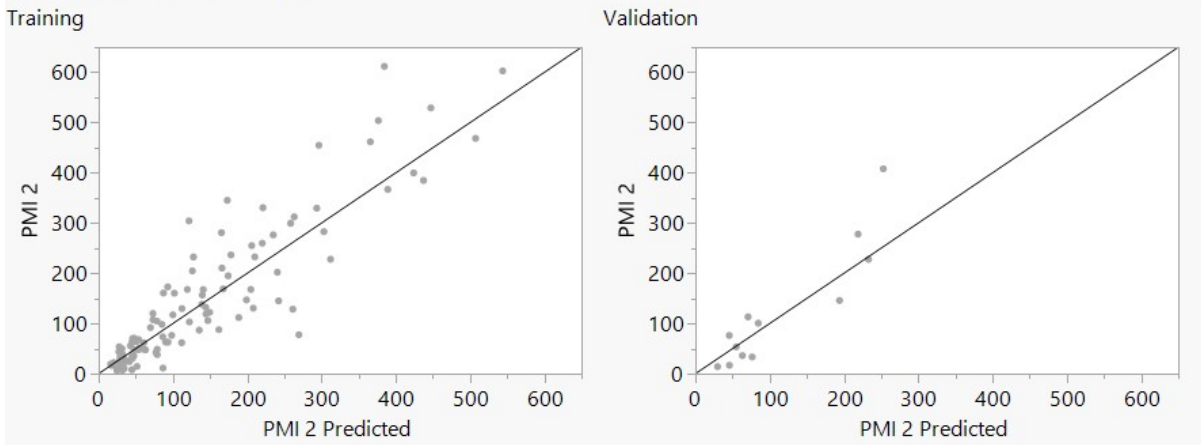

### Prediction Expression

$$\text{Exp} \left( \begin{aligned} &3.8790745637 \\ &+ -0.825211216 \cdot \text{Lin2} \\ &+ 0.0458106703 \cdot \text{cCM}^* \\ &+ (\text{cCM}^* - 37.42752) \cdot ((\text{MW} - 311.29096) \cdot -0.000131784) \end{aligned} \right) \cdot \text{Gamma} \left( 1 + 0.4279294041 \wedge \right)$$

Python code for the calculation of pPMI using the model above is provided in the supplementary information section.

## 4. Worked example AZD4831

The predicted PMI for Route A using the ACS PMI Calculator was generated using the information below:

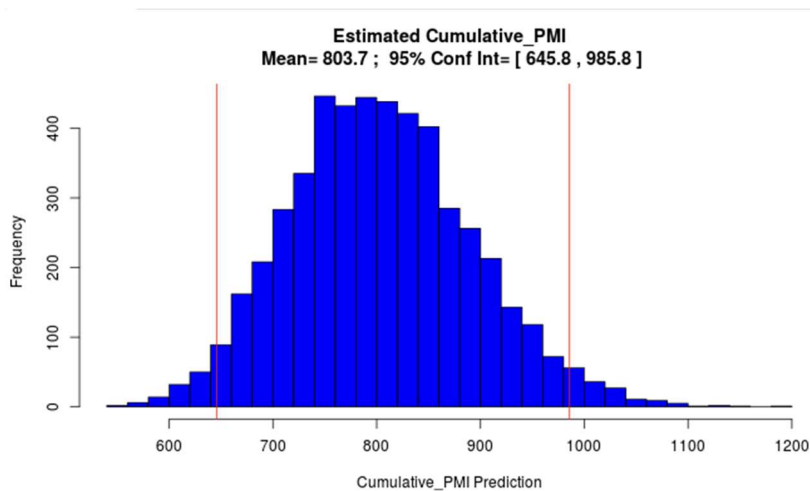

### Step PMI

Two significant figures are used for step yield ranges

|                  |                                                    |                                          |                                           |                            |
|------------------|----------------------------------------------------|------------------------------------------|-------------------------------------------|----------------------------|
| MW of A :<br>219 |                                                    |                                          |                                           |                            |
| MW of B :<br>323 | Load from Preset:<br>Condensation: Imine Formation | Step PMI, kg/kg ProductB (Min):<br>10.6  | Step PMI, kg/kg ProductB (Max):<br>24.1   | Molar Yield<br>0.9 — 0.94  |
| MW of C :<br>339 | Load from Preset:<br>Addition, 1,2-                | Step PMI, kg/kg ProductC (Min):<br>24.1  | Step PMI, kg/kg ProductC (Max):<br>93.05  | Molar Yield<br>0.73 — 0.92 |
| MW of D :<br>235 | Load from Preset:<br>Amide Hydrolysis              | Step PMI, kg/kg ProductD (Min):<br>30.95 | Step PMI, kg/kg ProductD (Max):<br>71.1   | Molar Yield<br>0.87 — 0.92 |
| MW of E :<br>335 | Load from Preset:<br>N-Protection                  | Step PMI, kg/kg ProductE (Min):<br>11    | Step PMI, kg/kg ProductE (Max):<br>35.175 | Molar Yield<br>0.83 — 0.95 |
| MW of F :<br>435 | Load from Preset:<br>N-Protection                  | Step PMI, kg/kg ProductF (Min):<br>11    | Step PMI, kg/kg ProductF (Max):<br>35.175 | Molar Yield<br>0.83 — 0.95 |
| MW of G :<br>384 | Load from Preset:<br>Halogen/Metal exchange        | Step PMI, kg/kg ProductG (Min):<br>28.7  | Step PMI, kg/kg ProductG (Max):<br>40.05  | Molar Yield<br>0.9 — 0.98  |
| MW of H :<br>522 | Load from Preset:<br>Reductive Amination           | Step PMI, kg/kg ProductH (Min):<br>22.8  | Step PMI, kg/kg ProductH (Max):<br>91.2   | Molar Yield<br>0.7 — 0.83  |
| MW of I :<br>535 | Load from Preset:<br>Amidation                     | Step PMI, kg/kg ProductI (Min):<br>19.7  | Step PMI, kg/kg ProductI (Max):<br>67.2   | Molar Yield<br>0.77 — 0.92 |
| MW of J :<br>335 | Load from Preset:<br>Deprotection                  | Step PMI, kg/kg ProductJ (Min):<br>17.9  | Step PMI, kg/kg ProductJ (Max):<br>72.125 | Molar Yield<br>0.84 — 0.95 |
| MW of K :<br>335 | Load from Preset:<br>Recrystallization             | Step PMI, kg/kg ProductK (Min):<br>15.2  | Step PMI, kg/kg ProductK (Max):<br>33.9   | Molar Yield<br>0.8 — 0.95  |

We are unable to disclose information regarding Route B due to commercial reasons.

## 5. Literature examples

Synthetic routes are provided by the references stated in the main manuscript (Tables 4 and 5).

Predicted PMIs from the ACS PMI Calculator are as referenced,<sup>6</sup> with the exception of compounds **19** and **25** which are provided below.

### Deucravacitinib **19**

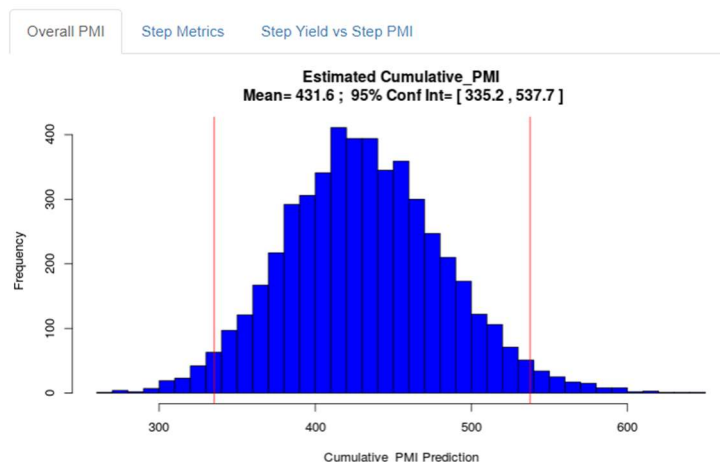

#### Step PMI

Two significant figures are used for step yield ranges

| MW of A: | Load from Preset:                | Step PMI, kg/kg ProductB (Min): | Step PMI, kg/kg ProductB (Max): | Molar Yield |
|----------|----------------------------------|---------------------------------|---------------------------------|-------------|
| 167.6    | Cyclocondensation                | 26.25                           | 63.475                          | 0.62 - 0.69 |
| MW of B: |                                  |                                 |                                 |             |
| 223.7    |                                  |                                 |                                 |             |
| MW of C: | Load from Preset:                | Step PMI, kg/kg ProductC (Min): | Step PMI, kg/kg ProductC (Max): | Molar Yield |
| 268.7    | Electrophilic Aromatic Nitration | 40.025                          | 67.225                          | 0.8 - 0.91  |
| MW of D: |                                  |                                 |                                 |             |
| 204.23   | Nitro Reduction                  | 27.1                            | 65.475                          | 0.78 - 0.92 |
| MW of E: |                                  |                                 |                                 |             |
| 360.8    | NAS: Nitrogen Nucleophile        | 13.3                            | 51.8                            | 0.79 - 0.92 |
| MW of F: |                                  |                                 |                                 |             |
| 409.4    | C-N coupling                     | 32.125                          | 141                             | 0.84 - 0.85 |
| MW of G: |                                  |                                 |                                 |             |
| 425.5    | Amidation                        | 19.7                            | 67.2                            | 0.77 - 0.92 |
| MW of H: |                                  |                                 |                                 |             |
| 425.5    | Recrystallization                | 15.2                            | 33.9                            | 0.8 - 0.86  |

<sup>6</sup> A. Borovika, J. Albrecht, J. Li, A. S. Wells, C. Briddell, B. R. Dillon, L. J. Diorazio, J. R. Gage, F. Gallou, S. G. Koenig, M. E. Kopach, D. K. Leahy, I. Martinez, M. Olbrich, J. L. Piper, F. Roschangar, E. C. Sherer, M. D. Eastgate, *Nat. Sustain.*, **2019**, 2, 1034.

# BMS-741672 25

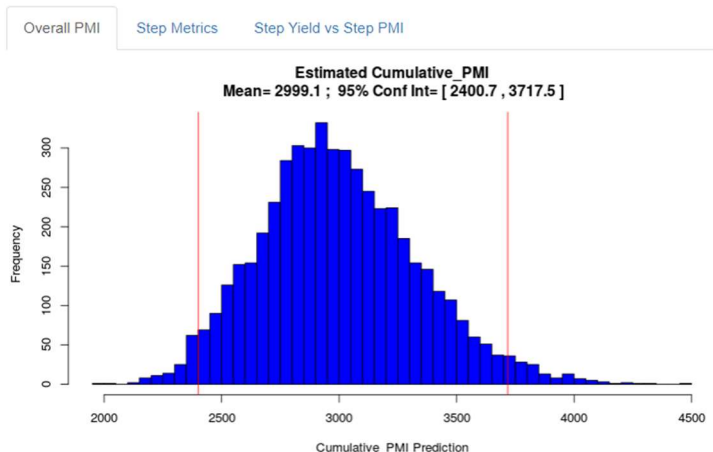

## Step PMI

Two significant figures are used for step yield ranges

| MW of A: |                     |                                 |                                 |             |
|----------|---------------------|---------------------------------|---------------------------------|-------------|
| 156.2    |                     |                                 |                                 |             |
| MW of B: | Load from Preset:   | Step PMI, kg/kg ProductB (Min): | Step PMI, kg/kg ProductB (Max): | Molar Yield |
| 228.2    | Alpha Acylation     | 17                              | 28.5                            | 0.73 — 0.95 |
| MW of C: | Load from Preset:   | Step PMI, kg/kg ProductC (Min): | Step PMI, kg/kg ProductC (Max): | Molar Yield |
| 331.4    | Reductive Amination | 22.8                            | 91.2                            | 0.7 — 0.85  |
| MW of D: | Load from Preset:   | Step PMI, kg/kg ProductD (Min): | Step PMI, kg/kg ProductD (Max): | Molar Yield |
| 331.4    | Salt Formation      | 9                               | 29.275                          | 0.83 — 0.94 |
| MW of E: | Load from Preset:   | Step PMI, kg/kg ProductE (Min): | Step PMI, kg/kg ProductE (Max): | Molar Yield |
| 229.3    | Deprotection        | 17.9                            | 72.125                          | 0.84 — 0.95 |
| MW of F: | Load from Preset:   | Step PMI, kg/kg ProductF (Min): | Step PMI, kg/kg ProductF (Max): | Molar Yield |
| 494.6    | Amidation           | 19.7                            | 67.2                            | 0.77 — 0.92 |
| MW of G: | Load from Preset:   | Step PMI, kg/kg ProductG (Min): | Step PMI, kg/kg ProductG (Max): | Molar Yield |
| 509.6    | Methylation         | 20.475                          | 57.8                            | 0.79 — 0.95 |
| MW of H: | Load from Preset:   | Step PMI, kg/kg ProductH (Min): | Step PMI, kg/kg ProductH (Max): | Molar Yield |
| 446.5    | Cycloalkylation     | 26.65                           | 58.5                            | 0.72 — 0.91 |
| MW of I: | Load from Preset:   | Step PMI, kg/kg ProductI (Min): | Step PMI, kg/kg ProductI (Max): | Molar Yield |
| 402.4    | Deprotection        | 17.9                            | 72.125                          | 0.84 — 0.95 |
| MW of J: | Load from Preset:   | Step PMI, kg/kg ProductJ (Min): | Step PMI, kg/kg ProductJ (Max): | Molar Yield |
| 459.6    | Reductive Amination | 22.8                            | 91.2                            | 0.7 — 0.85  |



|                    |                                                |                                            |                                            |                            |
|--------------------|------------------------------------------------|--------------------------------------------|--------------------------------------------|----------------------------|
| MW of K :<br>431.5 | Load from Preset:<br>Ester Hydrolysis          | Step PMI, kg/kg ProductK (Min) :<br>15.2   | Step PMI, kg/kg ProductK (Max) :<br>68.375 | Molar Yield<br>0.79 — 0.96 |
| MW of L :<br>502.7 | Load from Preset:<br>Other Rearrangement       | Step PMI, kg/kg ProductL (Min) :<br>17.825 | Step PMI, kg/kg ProductL (Max) :<br>37.25  | Molar Yield<br>0.76 — 0.88 |
| MW of M :<br>444.6 | Load from Preset:<br>Deprotection              | Step PMI, kg/kg ProductM (Min) :<br>17.9   | Step PMI, kg/kg ProductM (Max) :<br>72.125 | Molar Yield<br>0.84 — 0.95 |
| MW of N :<br>310.4 | Load from Preset:<br>Deprotection              | Step PMI, kg/kg ProductN (Min) :<br>17.9   | Step PMI, kg/kg ProductN (Max) :<br>72.125 | Molar Yield<br>0.84 — 0.95 |
| MW of T :<br>232.6 | Load from Preset:<br>Chlorodehydration         | Step PMI, kg/kg ProductT (Min) :<br>18.05  | Step PMI, kg/kg ProductT (Max) :<br>44.425 | Molar Yield<br>0.82 — 0.93 |
| MW of P :<br>161.1 |                                                |                                            |                                            |                            |
| MW of Q :<br>287   | Load from Preset:<br>Oxidative Iodination      | Step PMI, kg/kg ProductQ (Min) :<br>17.2   | Step PMI, kg/kg ProductQ (Max) :<br>31.7   | Molar Yield<br>0.83 — 0.95 |
| MW of R :<br>186.1 | Load from Preset:<br>NAS: Carbon Nucleophile   | Step PMI, kg/kg ProductR (Min) :<br>23.5   | Step PMI, kg/kg ProductR (Max) :<br>35.2   | Molar Yield<br>0.78 — 0.9  |
| MW of S :<br>241.2 | Load from Preset:<br>Cyclocondensation         | Step PMI, kg/kg ProductS (Min) :<br>26.25  | Step PMI, kg/kg ProductS (Max) :<br>63.475 | Molar Yield<br>0.82 — 0.89 |
| MW of O :<br>232.6 | Load from Preset:<br>NAS: Nitrogen Nucleophile | Step PMI, kg/kg ProductO (Min) :<br>13.3   | Step PMI, kg/kg ProductO (Max) :<br>51.8   | Molar Yield<br>0.79 — 0.92 |

## 6. Dataset

| entry | Step(LLS) | Step(total) | Ideality | Linearity | Convergency | Yield | PMI   | ACSPMI | pPMI | SCS  | $\Sigma C_{SCS}$ | CM*  | $\Sigma C_M^*$ |
|-------|-----------|-------------|----------|-----------|-------------|-------|-------|--------|------|------|------------------|------|----------------|
| 1     | 1         | 1           | 1.00     | 1.00      | 1.00        | 0.66  | 53.7  | 34     | 28   | 2.27 | 4.14             | 8.24 | 15.04          |
| 2     | 1         | 1           | 1.00     | 1.00      | 1.00        | 0.68  | 33.4  | 26     | 33   | 3.72 | 5.77             | 8.44 | 16.30          |
| 3     | 1         | 1           | 1.00     | 1.00      | 1.00        | 0.69  | 7.25  | 33     | 32   | 1.85 | 3.08             | 8.33 | 15.34          |
| 4     | 1         | 1           | 1.00     | 1.00      | 1.00        | 0.70  | 43.7  | 46     | 27   | 1.61 | 2.90             | 7.48 | 14.57          |
| 5     | 1         | 1           | 1.00     | 1.00      | 1.00        | 0.72  | 32.9  | 54     | 29   | 1.55 | 2.93             | 7.57 | 15.06          |
| 6     | 1         | 1           | 1.00     | 1.00      | 1.00        | 0.74  | 23.2  | 45     | 27   | 2.76 | 4.37             | 7.83 | 15.59          |
| 7     | 1         | 1           | 1.00     | 1.00      | 1.00        | 0.78  | 14.1  | 33     | 30   | 2.47 | 3.71             | 8.42 | 15.65          |
| 8     | 1         | 1           | 1.00     | 1.00      | 1.00        | 0.78  | 16.55 | 14     | 17   | 1.55 | 2.55             | 6.66 | 11.69          |
| 9     | 1         | 1           | 1.00     | 1.00      | 0.60        | 0.80  | 27.4  | 45     | 34   | 2.60 | 4.25             | 8.49 | 15.84          |
| 10    | 1         | 1           | 1.00     | 1.00      | 1.00        | 0.83  | 18.8  | 19     | 31   | 2.45 | 3.76             | 8.36 | 15.44          |
| 11    | 1         | 1           | 1.00     | 1.00      | 1.00        | 0.84  | 23.2  | 18     | 31   | 2.96 | 5.49             | 8.23 | 15.44          |
| 12    | 1         | 1           | 1.00     | 1.00      | 1.00        | 0.85  | 49.8  | 70     | 31   | 1.90 | 3.78             | 7.95 | 16.00          |
| 13    | 1         | 1           | 1.00     | 1.00      | 1.00        | 0.87  | 9.6   | 33     | 24   | 2.52 | 4.18             | 7.86 | 15.23          |
| 14    | 1         | 1           | 1.00     | 1.00      | 1.00        | 0.90  | 30.9  | 57     | 45   | 2.61 | 4.62             | 8.77 | 16.53          |
| 15    | 1         | 1           | 1.00     | 1.00      | 1.00        | 0.90  | 9.2   | 45     | 29   | 2.05 | 3.59             | 7.60 | 15.18          |
| 16    | 1         | 1           | 1.00     | 1.00      | 0.50        | 0.92  | 38.5  | 43     | 32   | 2.82 | 4.17             | 8.39 | 15.96          |
| 17    | 1         | 1           | 1.00     | 1.00      | 1.00        | 0.92  | 10.4  | 45     | 25   | 2.11 | 3.49             | 7.89 | 15.49          |
| 18    | 1         | 1           | 1.00     | 1.00      | 1.00        | 0.92  | 10.4  | 43     | 34   | 2.17 | 3.86             | 8.88 | 17.14          |
| 19    | 1         | 1           | 1.00     | 1.00      | 1.00        | 0.93  | 53.6  | 31     | 22   | 1.97 | 3.46             | 7.52 | 14.94          |
| 20    | 1         | 1           | 1.00     | 1.00      | 1.00        | 0.94  | 23.8  | 45     | 36   | 1.77 | 3.24             | 8.86 | 17.13          |
| 21    | 1         | 1           | 1.00     | 1.00      | 1.00        | 0.94  | 9.2   | 70     | 25   | 2.04 | 3.53             | 7.25 | 14.23          |
| 22    | 1         | 1           | 1.00     | 1.00      | 1.00        | 0.95  | 8     | 31     | 45   | 2.88 | 4.73             | 8.97 | 17.50          |
| 23    | 2         | 3           | 0.50     | 0.67      | 0.67        | 0.55  | 160.4 | 90     | 102  | 3.19 | 6.61             | 9.59 | 27.20          |
| 24    | 2         | 2           | 0.50     | 1.00      | 0.50        | 0.60  | 64.2  | 70     | 51   | 2.84 | 7.21             | 7.82 | 23.41          |
| 25    | 2         | 2           | 0.50     | 1.00      | 0.50        | 0.65  | 47.6  | 95     | 63   | 2.02 | 6.43             | 8.94 | 26.45          |
| 26    | 2         | 2           | 1.00     | 1.00      | 0.60        | 0.70  | 32.65 | 60     | 30   | 2.36 | 4.91             | 7.37 | 19.06          |
| 27    | 2         | 2           | 0.50     | 1.00      | 0.67        | 0.77  | 47.5  | 70     | 48   | 2.74 | 5.60             | 8.46 | 23.34          |
| 28    | 2         | 3           | 1.00     | 0.67      | 0.50        | 0.80  | 63.1  | 36     | 90   | 3.35 | 8.84             | 8.94 | 24.38          |

| entry | Step(LLS) | Step(total) | Ideality | Linearity | Convergency | Yield | PMI   | ACSPMI | pPMI | SCS  | $\Sigma C_{SCS}$ | CM*  | $\Sigma C_{M^*}$ |
|-------|-----------|-------------|----------|-----------|-------------|-------|-------|--------|------|------|------------------|------|------------------|
| 29    | 2         | 2           | 0.50     | 1.00      | 0.60        | 0.80  | 55.7  | 90     | 43   | 2.40 | 5.99             | 7.79 | 22.97            |
| 30    | 2         | 2           | 0.50     | 1.00      | 0.50        | 0.81  | 61.5  | 53     | 45   | 2.11 | 5.87             | 8.12 | 23.57            |
| 31    | 2         | 2           | 0.50     | 1.00      | 0.60        | 0.81  | 76.3  | 70     | 45   | 2.29 | 5.61             | 8.18 | 23.48            |
| 32    | 2         | 2           | 1.00     | 1.00      | 0.60        | 0.82  | 70.2  | 136    | 46   | 2.10 | 5.03             | 7.78 | 22.85            |
| 33    | 2         | 2           | 1.00     | 1.00      | 0.60        | 0.85  | 70.7  | 74     | 48   | 2.96 | 6.45             | 8.38 | 23.87            |
| 34    | 2         | 2           | 1.00     | 1.00      | 0.60        | 0.85  | 33.5  | 53     | 76   | 2.66 | 7.38             | 9.25 | 26.75            |
| 35    | 2         | 2           | 0.50     | 1.00      | 0.50        | 0.87  | 35.7  | 120    | 47   | 2.23 | 6.09             | 8.37 | 25.51            |
| 36    | 2         | 2           | 1.00     | 1.00      | 0.44        | 0.88  | 48.8  | 96     | 79   | 4.42 | 10.19            | 9.51 | 25.81            |
| 37    | 2         | 2           | 0.50     | 1.00      | 0.50        | 0.89  | 16.9  | 89     | 46   | 2.67 | 6.38             | 8.39 | 24.04            |
| 38    | 2         | 2           | 1.00     | 1.00      | 1.50        | 0.90  | 71.2  | 44     | 42   | 2.02 | 5.48             | 7.99 | 22.93            |
| 39    | 2         | 2           | 1.00     | 1.00      | 0.31        | 0.90  | 53.6  | 70     | 55   | 3.14 | 7.39             | 8.75 | 24.59            |
| 40    | 2         | 2           | 1.00     | 1.00      | 0.44        | 0.77  | 113.2 | 135    | 71   | 3.66 | 8.29             | 9.26 | 25.78            |
| 41    | 2         | 2           | 0.50     | 1.00      | 0.50        | 0.91  | 35.2  | 74     | 45   | 2.40 | 6.59             | 8.15 | 23.38            |
| 42    | 2         | 2           | 0.50     | 1.00      | 0.50        | 0.94  | 51    | 105    | 54   | 2.12 | 5.36             | 8.65 | 25.78            |
| 43    | 2         | 2           | 1.00     | 1.00      | 0.60        | 0.94  | 14.6  | 125    | 52   | 2.16 | 5.69             | 8.14 | 22.37            |
| 44    | 3         | 3           | 0.33     | 1.00      | 0.33        | 0.39  | 107.6 | 121    | 73   | 2.53 | 8.39             | 8.16 | 31.72            |
| 45    | 3         | 3           | 0.33     | 1.00      | 0.50        | 0.58  | 38.2  | 96     | 79   | 2.42 | 7.48             | 9.24 | 29.91            |
| 46    | 3         | 4           | 0.50     | 0.75      | 0.57        | 0.73  | 117.2 | 158    | 100  | 3.67 | 10.88            | 8.49 | 31.90            |
| 47    | 3         | 3           | 1.00     | 1.00      | 0.50        | 0.78  | 108.4 | 86     | 72   | 2.42 | 7.90             | 8.26 | 31.19            |
| 48    | 3         | 4           | 0.25     | 0.75      | 0.33        | 0.79  | 232.4 | 158    | 128  | 3.76 | 10.37            | 9.75 | 36.95            |
| 49    | 3         | 3           | 0.67     | 1.00      | 0.38        | 0.81  | 11.3  | 70     | 87   | 2.24 | 8.72             | 8.31 | 33.79            |
| 50    | 3         | 3           | 0.67     | 1.00      | 0.43        | 0.82  | 92    | 126    | 70   | 2.35 | 8.93             | 7.92 | 31.30            |
| 51    | 3         | 3           | 0.33     | 1.00      | 0.43        | 0.82  | 98.3  | 148    | 85   | 2.38 | 8.29             | 8.73 | 33.51            |
| 52    | 3         | 6           | 1.00     | 0.50      | 0.33        | 0.82  | 156.7 | 175    | 139  | 4.41 | 13.25            | 9.08 | 33.47            |
| 53    | 3         | 3           | 0.66     | 1.00      | 0.40        | 0.83  | 42.3  | 118    | 77   | 2.91 | 8.51             | 8.61 | 31.95            |
| 54    | 3         | 5           | 0.40     | 0.60      | 0.33        | 0.85  | 138.4 | 184    | 139  | 3.86 | 10.29            | 9.70 | 36.15            |
| 55    | 3         | 3           | 1.00     | 1.00      | 0.38        | 0.85  | 160.8 | 180    | 87   | 2.81 | 10.20            | 7.99 | 34.74            |
| 56    | 3         | 3           | 0.33     | 1.00      | 0.40        | 0.86  | 62.8  | 103    | 93   | 2.19 | 7.55             | 9.02 | 34.80            |
| 57    | 3         | 3           | 0.67     | 1.00      | 0.31        | 0.88  | 76.4  | 166    | 98   | 4.64 | 14.82            | 9.49 | 35.30            |
| 58    | 3         | 3           | 0.67     | 1.00      | 0.44        | 0.91  | 68.1  | 74     | 54   | 2.74 | 7.65             | 7.72 | 26.78            |

| entry | Step(LLS) | Step(total) | Ideality | Linearity | Convergency | Yield | PMI   | ACSPMI | pPMI | SCS  | $\Sigma C_{SCS}$ | CM*  | $\Sigma C_{M^*}$ |
|-------|-----------|-------------|----------|-----------|-------------|-------|-------|--------|------|------|------------------|------|------------------|
| 59    | 3         | 3           | 0.33     | 1.00      | 0.40        | 0.93  | 120   | 121    | 73   | 2.40 | 8.02             | 8.12 | 31.60            |
| 60    | 3         | 3           | 0.67     | 1.00      | 0.38        | 0.95  | 104.7 | 103    | 79   | 3.19 | 9.64             | 8.19 | 32.06            |
| 61    | 3         | 3           | 0.75     | 1.00      | 0.31        | 0.97  | 172.9 | 227    | 93   | 3.53 | 11.82            | 8.94 | 34.72            |
| 62    | 3         | 3           | 0.67     | 1.00      | 0.19        | 0.97  | 73.6  | 124    | 86   | 3.21 | 10.59            | 8.83 | 33.42            |
| 63    | 4         | 4           | 0.50     | 1.00      | 0.31        | 0.74  | 100.7 | 129    | 84   | 2.74 | 10.38            | 7.55 | 34.33            |
| 64    | 4         | 6           | 0.67     | 0.67      | 0.31        | 0.75  | 168.9 | 316    | 168  | 3.47 | 11.76            | 8.85 | 42.36            |
| 65    | 4         | 4           | 0.75     | 1.00      | 0.36        | 0.79  | 167.8 | 217    | 119  | 3.20 | 12.13            | 8.18 | 39.47            |
| 66    | 4         | 5           | 0.40     | 0.80      | 0.36        | 0.79  | 167.6 | 197    | 141  | 3.67 | 14.55            | 8.49 | 40.40            |
| 67    | 4         | 4           | 0.75     | 1.00      | 0.22        | 0.79  | 103.2 | 260    | 122  | 5.00 | 19.82            | 9.63 | 44.93            |
| 68    | 4         | 4           | 0.75     | 1.00      | 0.33        | 0.81  | 129.7 | 250    | 112  | 3.19 | 10.51            | 8.09 | 38.67            |
| 69    | 4         | 5           | 0.20     | 0.80      | 0.29        | 0.82  | 345.3 | 334    | 173  | 3.23 | 13.57            | 8.38 | 42.78            |
| 70    | 4         | 4           | 0.75     | 1.00      | 0.40        | 0.83  | 158.4 | 130    | 118  | 2.84 | 10.75            | 8.23 | 39.42            |
| 71    | 4         | 4           | 0.75     | 1.00      | 0.27        | 0.85  | 86.8  | 139    | 135  | 3.02 | 11.73            | 8.16 | 41.95            |
| 72    | 4         | 4           | 0.25     | 1.00      | 0.29        | 0.89  | 119   | 206    | 144  | 2.45 | 10.01            | 8.58 | 43.38            |
| 73    | 4         | 6           | 0.67     | 0.67      | 0.19        | 0.89  | 87.8  | 193    | 162  | 4.34 | 14.93            | 9.63 | 43.05            |
| 74    | 4         | 9           | 0.56     | 0.44      | 0.25        | 0.90  | 232.7 | 303    | 209  | 4.87 | 15.16            | 9.80 | 45.94            |
| 75    | 4         | 7           | 0.86     | 0.57      | 0.25        | 0.90  | 195   | 216    | 174  | 4.41 | 17.65            | 9.08 | 42.55            |
| 76    | 4         | 4           | 0.25     | 1.00      | 0.25        | 0.91  | 304.3 | 362    | 122  | 2.53 | 10.92            | 8.16 | 39.88            |
| 77    | 4         | 4           | 0.50     | 1.00      | 0.33        | 0.96  | 61.8  | 177    | 112  | 3.00 | 10.48            | 9.24 | 39.15            |
| 78    | 4         | 4           | 0.80     | 1.00      | 0.28        | 0.91  | 204.7 | 270    | 126  | 3.81 | 15.62            | 9.20 | 43.93            |
| 79    | 5         | 8           | 0.63     | 0.63      | 0.28        | 0.68  | 259.9 | 258    | 221  | 4.78 | 16.90            | 9.36 | 50.34            |
| 80    | 5         | 5           | 0.80     | 1.00      | 0.31        | 0.70  | 210.4 | 155    | 166  | 3.50 | 15.64            | 8.77 | 48.24            |
| 81    | 5         | 6           | 0.67     | 0.83      | 0.25        | 0.84  | 167.8 | 149    | 204  | 3.35 | 15.08            | 8.91 | 50.87            |
| 82    | 5         | 5           | 0.60     | 1.00      | 0.29        | 0.84  | 206.7 | 170    | 182  | 2.48 | 13.22            | 7.99 | 47.41            |
| 83    | 5         | 7           | 0.57     | 0.71      | 0.24        | 0.84  | 227.8 | 376    | 232  | 3.47 | 15.23            | 8.85 | 51.21            |
| 84    | 5         | 8           | 0.63     | 0.63      | 0.25        | 0.85  | 236.6 | 117    | 179  | 4.24 | 14.63            | 8.94 | 43.28            |
| 85    | 5         | 10          | 0.50     | 0.50      | 0.20        | 0.85  | 312.3 | 388    | 263  | 4.87 | 20.03            | 9.80 | 55.74            |
| 86    | 5         | 5           | 0.60     | 1.00      | 0.18        | 0.87  | 122.3 | 313    | 149  | 5.00 | 24.82            | 9.63 | 54.55            |
| 87    | 5         | 7           | 0.57     | 0.71      | 0.16        | 0.88  | 130.5 | 237    | 207  | 4.34 | 19.27            | 9.63 | 52.68            |
| 88    | 5         | 5           | 0.40     | 1.00      | 0.26        | 0.89  | 112   | 194    | 189  | 3.37 | 13.38            | 9.15 | 52.53            |

| <i>entry</i> | <i>Step(LLS)</i> | <i>Step(total)</i> | <i>Ideality</i> | <i>Linearity</i> | <i>Convergency</i> | <i>Yield</i> | <i>PMI</i> | <i>ACSPMI</i> | <i>pPMI</i> | <i>SCS</i> | $\Sigma C_{SCS}$ | <i>CM*</i> | $\Sigma C_{M^*}$ |
|--------------|------------------|--------------------|-----------------|------------------|--------------------|--------------|------------|---------------|-------------|------------|------------------|------------|------------------|
| 89           | 5                | 6                  | 0.33            | 0.83             | 0.26               | 0.89         | 408        | 309           | 252         | 3.91       | 17.49            | 8.72       | 51.50            |
| 90           | 5                | 6                  | 0.17            | 0.83             | 0.18               | 0.90         | 330.6      | 359           | 220         | 3.89       | 18.15            | 9.50       | 55.96            |
| 91           | 5                | 5                  | 0.40            | 1.00             | 0.25               | 0.91         | 132.4      | 206           | 144         | 3.22       | 13.69            | 9.22       | 48.37            |
| 92           | 5                | 5                  | 0.80            | 1.00             | 0.29               | 0.94         | 105.9      | 251           | 147         | 3.81       | 14.33            | 8.76       | 47.42            |
| 93           | 5                | 5                  | 0.83            | 1.00             | 0.22               | 0.96         | 280.9      | 360           | 165         | 3.79       | 19.41            | 9.38       | 53.30            |
| 94           | 6                | 9                  | 0.66            | 0.67             | 0.26               | 0.68         | 313.7      | 229           | 336         | 3.52       | 16.74            | 8.92       | 56.33            |
| 95           | 6                | 6                  | 0.83            | 1.00             | 0.27               | 0.78         | 276.4      | 241           | 235         | 3.41       | 19.05            | 8.76       | 57.00            |
| 96           | 6                | 7                  | 0.43            | 0.86             | 0.23               | 0.85         | 202        | 298           | 241         | 4.43       | 21.92            | 9.31       | 60.80            |
| 97           | 6                | 9                  | 0.56            | 0.67             | 0.22               | 0.85         | 329.6      | 327           | 294         | 4.78       | 21.69            | 9.36       | 59.71            |
| 98           | 6                | 9                  | 0.67            | 0.67             | 0.22               | 0.89         | 255.1      | 208           | 207         | 4.89       | 19.51            | 9.32       | 52.60            |
| 99           | 6                | 7                  | 0.71            | 0.86             | 0.25               | 0.90         | 145.9      | 358           | 194         | 4.37       | 18.70            | 9.02       | 56.44            |
| 100          | 6                | 6                  | 0.50            | 1.00             | 0.20               | 0.95         | 147        | 284           | 199         | 3.57       | 17.26            | 9.24       | 57.61            |
| 101          | 6                | 6                  | 0.71            | 1.00             | 0.18               | 0.95         | 282.9      | 612           | 303         | 4.07       | 23.48            | 9.10       | 62.40            |
| 102          | 7                | 11                 | 0.27            | 0.64             | 0.18               | 0.72         | 367        | 486           | 390         | 4.13       | 21.11            | 9.58       | 71.06            |
| 103          | 7                | 8                  | 0.75            | 0.88             | 0.23               | 0.77         | 504        | 372           | 378         | 4.37       | 23.42            | 9.09       | 66.09            |
| 104          | 7                | 7                  | 0.43            | 1.00             | 0.17               | 0.83         | 384.9      | 512           | 437         | 4.08       | 21.34            | 8.68       | 66.29            |
| 105          | 7                | 10                 | 0.60            | 0.70             | 0.19               | 0.83         | 128.6      | 251           | 261         | 4.99       | 23.75            | 9.68       | 69.59            |
| 106          | 7                | 10                 | 0.50            | 0.70             | 0.21               | 0.83         | 454.9      | 375           | 296         | 5.00       | 26.92            | 9.77       | 70.57            |
| 107          | 7                | 10                 | 0.70            | 0.70             | 0.20               | 0.86         | 277.9      | 258           | 219         | 5.00       | 24.51            | 9.56       | 62.16            |
| 108          | 7                | 8                  | 0.63            | 0.88             | 0.20               | 0.88         | 145.2      | 423           | 243         | 4.37       | 23.06            | 9.02       | 65.45            |
| 109          | 7                | 10                 | 0.70            | 0.70             | 0.21               | 0.88         | 449.5      | 310           | 472         | 3.42       | 20.16            | 9.01       | 65.34            |
| 110          | 7                | 7                  | 0.63            | 1.00             | 0.22               | 0.96         | 529.2      | 495           | 447         | 4.07       | 27.55            | 9.10       | 71.50            |
| 111          | 8                | 11                 | 0.64            | 0.73             | 0.17               | 0.75         | 299.4      | 310           | 259         | 5.00       | 29.51            | 9.56       | 71.72            |
| 112          | 8                | 9                  | 0.67            | 0.89             | 0.18               | 0.79         | 602.9      | 439           | 544         | 4.37       | 27.79            | 9.09       | 75.19            |
| 113          | 8                | 11                 | 0.73            | 0.73             | 0.17               | 0.80         | 673.4      | 426           | 649         | 3.66       | 23.82            | 9.15       | 74.50            |
| 114          | 8                | 12                 | 0.25            | 0.67             | 0.16               | 0.81         | 468.6      | 568           | 509         | 4.13       | 25.24            | 9.58       | 80.63            |
| 115          | 8                | 9                  | 0.56            | 0.89             | 0.22               | 0.82         | 399.8      | 529           | 424         | 4.80       | 26.14            | 9.49       | 75.78            |
| 116          | 8                | 11                 | 0.55            | 0.73             | 0.17               | 0.86         | 228        | 302           | 313         | 4.99       | 28.73            | 9.68       | 79.27            |
| 117          | 8                | 11                 | 0.45            | 0.73             | 0.17               | 1.00         | 461.8      | 443           | 366         | 5.00       | 31.92            | 9.77       | 80.34            |
| 118          | 9                | 13                 | 0.69            | 0.69             | 0.17               | 1.00         | 715.3      | 566           | 612         | 4.33       | 28.15            | 9.61       | 84.11            |

| <i>entry</i> | <i>Step(LLS)</i> | <i>Step(total)</i> | <i>Ideality</i> | <i>Linearity</i> | <i>Convergency</i> | <i>Yield</i> | <i>PMI</i> | <i>ACSPMI</i> | <i>pPMI</i> | <i>SCS</i> | $\Sigma C_{SCS}$ | <i>CM*</i> | $\Sigma C_{M^*}$ |
|--------------|------------------|--------------------|-----------------|------------------|--------------------|--------------|------------|---------------|-------------|------------|------------------|------------|------------------|
| 119          | 9                | 10                 | 0.60            | 0.90             | 0.21               | -            | 612        | 581           | 385         | 5.00       | 31.14            | 9.60       | 85.37            |
| 120          | 10               | 14                 | 0.64            | 0.71             | 0.15               | 0.67         | 930.9      | 671           | 822         | 4.33       | 32.48            | 9.61       | 93.72            |
